# Supplementary material for: The Relationship between Baseline Neutrophils Counts and Response to 12 Weeks of Antipsychotics in First-Episode Psychosis
Source: Research Square preprint supplement (doi:10.21203/rs.3.rs-8502917/v1), 2026-01-20

**Table 1. Demographics of Study Subjects**: Of the first-episode psychosis subjects recruited in this study, we excluded non-responders who dropped out before week 4, individuals with missing or outlier neutrophil or lymphocyte counts, and individuals with more than 15 days elapsed between date of study entry and baseline blood draw, resulting in a total of *n = 8*5 subjects. There were no significant differences in biological sex, race, baseline antipsychotic naïve status, smoking status, BMI, and age between treatment responders and non-responders.


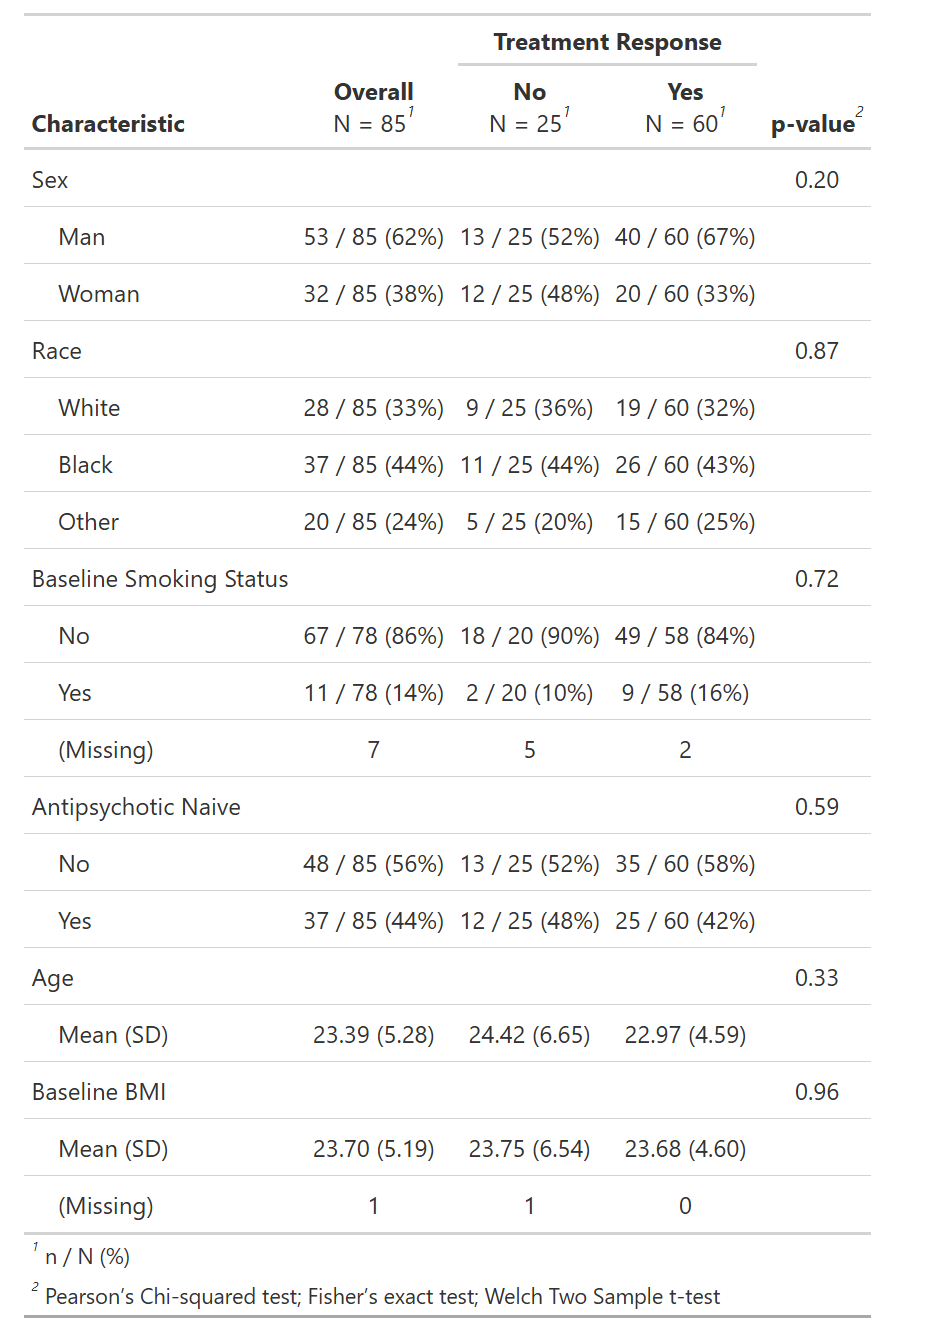

Supplement: Supplementary file 1 [file 5bc1dedd4dff9e1f0a3ee329.docx]
